# Supplementary material
Source: publisher figshare collection journal article supplement (https://acs.figshare.com/ndownloader/files/5690361)
Supplement: Supplementary file 1 [file 5690361]

# ic010063y.cif

data_d:\frames\hamm5\work\hamm5
 
#  1. SUBMISSION DETAILS

_publ_contact_author
;
       Heinrich N\"oth
       Institut f\"ur anorganische Chemie
       Universit\"at M\"unchen
       Butenandtstr. 5-13 (Haus D)
       81377 M\"unchen
       Bundesrepublik Deutschland
;
_publ_contact_author_phone        '089 2180 7454'
_publ_contact_author_fax          '089 2180 7865'
_publ_contact_author_email        H.Noeth@lrz.uni-muenchen.de
_publ_requested_journal           ?

#  3. TITLE AND AUTHOR LIST

_publ_section_title
;
[N2H5]+2[N4C-N=N-CN4]2-: A New High-Nitrogen High-Energetic Material
;

loop_

_publ_author_name
_publ_author_address
       'Heinrich N\"oth'
;     Institut f\"ur anorganische Chemie
       Universit\"at M\"unchen
       Butenandtstr. 5-13 (Haus D)
       81377 M\"unchen
       Bundesrepublik Deutschland
;
       'Th. Klap\"otke'
;     Institut f\"ur anorganische Chemie
       Universit\"at M\"unchen
       Butenandtstr. 5-13 (Haus D)
       81377 M\"unchen
       Bundesrepublik Deutschland
;
       'A. Hammerl'
;     Institut f\"ur anorganische Chemie
       Universit\"at M\"unchen
       Butenandtstr. 5-13 (Haus D)
       81377 M\"unchen
       Bundesrepublik Deutschland
;
  'M. Warchhold'
;     Institut f\"ur anorganische Chemie
       Universit\"at M\"unchen
       Butenandtstr. 5-13 (Haus D)
       81377 M\"unchen
       Bundesrepublik Deutschland
;
       'G. Holl'
;     Wehrwissenschaftliches Institut fuer Werk-, Explosiv- und Betriebsstoffe
       53913 Swisstal
       Bundesrepublik Deutschland
;
       'M. Kaiser'
;     Wehrwissenschaftliches Institut fuer Werk-, Explosiv- und Betriebsstoffe
       53913 Swisstal
       Bundesrepublik Deutschland
;
       'U. Ticmanis'
;     Wehrwissenschaftliches Institut fuer Werk-, Explosiv- und Betriebsstoffe
       53913 Swisstal
       Bundesrepublik Deutschland
;

_publ_manuscript_creation         'RTF-File by CIFRTF (H.Schwenk 1996)'

_audit_creation_method            'SHELXL-CIF-file updated by CIFRTF'
_chemical_name_systematic
;
?
;
_chemical_name_common             ?
_chemical_melting_point           ?
_chemical_formula_moiety          ?
_chemical_formula_sum
  'C2 H12 N14 O'
_chemical_formula_weight          248.26
 
loop_
  _atom_type_symbol
  _atom_type_description
  _atom_type_scat_dispersion_real
  _atom_type_scat_dispersion_imag
  _atom_type_scat_source
  'C'  'C'   0.0033   0.0016
  'International Tables Vol C Tables 4.2.6.8 and 6.1.1.4'
  'H'  'H'   0.0000   0.0000
  'International Tables Vol C Tables 4.2.6.8 and 6.1.1.4'
  'N'  'N'   0.0061   0.0033
  'International Tables Vol C Tables 4.2.6.8 and 6.1.1.4'
  'O'  'O'   0.0106   0.0060
  'International Tables Vol C Tables 4.2.6.8 and 6.1.1.4'
 
_symmetry_cell_setting            Monoclinic
_symmetry_space_group_name_H-M    P2/c
 
loop_
  _symmetry_equiv_pos_as_xyz
  'x, y, z'
  '-x, y, -z+1/2'
  '-x, -y, -z'
  'x, -y, z-1/2'
 
_cell_length_a                    8.9575(19)
_cell_length_b                    3.6596(7)
_cell_length_c                    16.200(3)
_cell_angle_alpha                 90.00
_cell_angle_beta                  96.834(3)
_cell_angle_gamma                 90.00
_cell_volume                      527.28(19)
_cell_formula_units_Z             2
_cell_measurement_temperature     193(2)
_cell_measurement_reflns_used     414
_cell_measurement_theta_min       20.00
_cell_measurement_theta_max       1.00
 
_exptl_crystal_description        needle
_exptl_crystal_colour             yellow
_exptl_crystal_size_max           0.60
_exptl_crystal_size_mid           0.10
_exptl_crystal_size_min           0.10
_exptl_crystal_density_meas       ?
_exptl_crystal_density_diffrn     1.564
_exptl_crystal_density_method     'not measured'
_exptl_crystal_F_000              260
_exptl_absorpt_coefficient_mu     0.128
_exptl_absorpt_correction_type    SADABS
_exptl_absorpt_correction_T_min   0.530108
_exptl_absorpt_correction_T_max   0.962232
_exptl_absorpt_process_details    ?
 
_exptl_special_details
;
Diffractometer operator           M. Warchhold
scanspeed_seconds/frame           10
1200 frames measured in phi (0-360) with chi=0 and om=2th=25
65 frames measured in om (15-35) with chi=280, 2th=29 and phi=0
Crystal mounted in perfluorpolyetheroil
;
 
_diffrn_ambient_temperature       193(2)
_diffrn_radiation_wavelength      0.71073
_diffrn_radiation_type            MoK\a
_diffrn_radiation_source          'fine-focus sealed tube'
_diffrn_radiation_monochromator   graphite
_diffrn_measurement_device_type   'Siemens SMART Area-detector'
_diffrn_measurement_method        Hemisphere
_diffrn_detector_area_resol_mean  ?
_diffrn_standards_number          ?
_diffrn_standards_interval_count  ?
_diffrn_standards_interval_time   0
_diffrn_standards_decay_%         ?
_diffrn_reflns_number             2889
_diffrn_reflns_av_R_equivalents   0.0369
_diffrn_reflns_av_sigmaI/netI     0.0310
_diffrn_reflns_limit_h_min        -10
_diffrn_reflns_limit_h_max        10
_diffrn_reflns_limit_k_min        -4
_diffrn_reflns_limit_k_max        2
_diffrn_reflns_limit_l_min        -19
_diffrn_reflns_limit_l_max        19
_diffrn_reflns_theta_min          2.29
_diffrn_reflns_theta_max          28.90
_reflns_number_total              890
_reflns_number_gt                 719
_reflns_threshold_expression      >2sigma(I)
 
_computing_data_collection        'SMART (V4.C50)'
_computing_cell_refinement        'SMART (V4.C50)'
_computing_data_reduction         'SAINT (V4.D50)'
_computing_structure_solution     'SHELXS-97 (Sheldrick, 1990)' '
_computing_structure_refinement   'SHELXL-97 (Sheldrick, 1997)' '
_computing_molecular_graphics     'XP (SHELXTL-Ver.5)'
_computing_publication_material   'SHELXL (Sheldrick 1997)'
 
_refine_special_details
;
  Refinement of F^2^ against ALL reflections.  The weighted R-factor wR and
  goodness of fit S are based on F^2^, conventional R-factors R are based
  on F, with F set to zero for negative F^2^. The threshold expression of
  F^2^ > 2sigma(F^2^) is used only for calculating R-factors(gt) etc. and is
  not relevant to the choice of reflections for refinement.  R-factors based
  on F^2^ are statistically about twice as large as those based on F, and R-
  factors based on ALL data will be even larger.
;
 
_refine_ls_structure_factor_coef  Fsqd
_refine_ls_matrix_type            full
_refine_ls_weighting_scheme       calc
_refine_ls_weighting_details
  'calc w=1/[\s^2^(Fo^2^)+(0.0842P)^2^+0.3225P] where P=(Fo^2^+2Fc^2^)/3'
_atom_sites_solution_primary      'direct methods'
_atom_sites_solution_secondary    difmap
_atom_sites_solution_hydrogens    'found by diffmap'
_refine_ls_hydrogen_treatment     'mixed '
_refine_ls_extinction_method      none
_refine_ls_extinction_coef        ?
_refine_ls_number_reflns          890
_refine_ls_number_parameters      102
_refine_ls_number_restraints      0
_refine_ls_R_factor_all           0.0650
_refine_ls_R_factor_gt            0.0499
_refine_ls_wR_factor_ref          0.1383
_refine_ls_wR_factor_gt           0.1286
_refine_ls_goodness_of_fit_ref    1.050
_refine_ls_restrained_S_all       1.050
_refine_ls_shift/su_max           0.000
_refine_ls_shift/su_mean          0.000
 
loop_
  _atom_site_label
  _atom_site_type_symbol
  _atom_site_fract_x
  _atom_site_fract_y
  _atom_site_fract_z
  _atom_site_U_iso_or_equiv
  _atom_site_adp_type
  _atom_site_occupancy
  _atom_site_symmetry_multiplicity
  _atom_site_calc_flag
  _atom_site_refinement_flags
  _atom_site_disorder_assembly
  _atom_site_disorder_group
N3 N 0.3607(2) -0.4024(7) 0.59335(13) 0.0290(6) Uani 1 1 d . . .
N1 N 0.0078(2) -0.0070(6) 0.53904(12) 0.0249(6) Uani 1 1 d . . .
N5 N 0.1841(2) -0.1488(7) 0.65468(12) 0.0272(6) Uani 1 1 d . . .
N2 N 0.2528(2) -0.3104(7) 0.53269(12) 0.0257(6) Uani 1 1 d . . .
N4 N 0.3197(2) -0.3064(7) 0.66650(13) 0.0298(6) Uani 1 1 d . . .
C1 C 0.1472(3) -0.1544(8) 0.57270(14) 0.0226(6) Uani 1 1 d . . .
N6 N 0.2440(3) -0.5193(8) 0.36173(13) 0.0274(6) Uani 1 1 d . . .
N7 N 0.3474(2) -0.2479(7) 0.33599(14) 0.0266(6) Uani 1 1 d . . .
O1 O 0.0000 0.2538(9) 0.7500 0.0291(7) Uani 1 2 d S . .
H71N H 0.439(4) -0.295(10) 0.368(2) 0.049(9) Uiso 1 1 d . . .
H63N H 0.151(4) -0.484(9) 0.3280(19) 0.036(8) Uiso 1 1 d . . .
H62N H 0.241(4) -0.478(10) 0.419(2) 0.051(10) Uiso 1 1 d . . .
H61N H 0.275(4) -0.777(13) 0.354(2) 0.058(12) Uiso 1 1 d . . .
H11O H 0.048(4) 0.111(12) 0.724(2) 0.059(11) Uiso 1 1 d . . .
H72N H 0.356(4) -0.286(9) 0.287(2) 0.038(9) Uiso 1 1 d . . .
 
loop_
  _atom_site_aniso_label
  _atom_site_aniso_U_11
  _atom_site_aniso_U_22
  _atom_site_aniso_U_33
  _atom_site_aniso_U_23
  _atom_site_aniso_U_13
  _atom_site_aniso_U_12
N3 0.0259(11) 0.0351(16) 0.0250(11) 0.0001(10) -0.0016(8) 0.0052(10)
N1 0.0203(10) 0.0304(16) 0.0235(9) 0.0005(9) 0.0005(8) 0.0008(10)
N5 0.0225(11) 0.0355(17) 0.0231(11) 0.0032(9) 0.0002(8) 0.0032(11)
N2 0.0222(10) 0.0313(17) 0.0231(10) 0.0004(9) 0.0004(8) 0.0020(10)
N4 0.0280(11) 0.0348(17) 0.0255(11) 0.0014(10) -0.0012(8) 0.0075(11)
C1 0.0184(11) 0.0260(18) 0.0229(12) 0.0009(10) 0.0001(9) 0.0001(11)
N6 0.0293(12) 0.0283(19) 0.0239(11) -0.0013(10) 0.0002(9) 0.0021(11)
N7 0.0219(11) 0.0341(16) 0.0232(11) -0.0012(10) 0.0002(8) 0.0021(10)
O1 0.0208(13) 0.041(2) 0.0258(13) 0.000 0.0047(10) 0.000
 
_geom_special_details
;
  All esds (except the esd in the dihedral angle between two l.s. planes)
  are estimated using the full covariance matrix.  The cell esds are taken
  into account individually in the estimation of esds in distances, angles
  and torsion angles; correlations between esds in cell parameters are only
  used when they are defined by crystal symmetry.  An approximate (isotropic)
  treatment of cell esds is used for estimating esds involving l.s. planes.
;
 
loop_
  _geom_bond_atom_site_label_1
  _geom_bond_atom_site_label_2
  _geom_bond_distance
  _geom_bond_site_symmetry_2
  _geom_bond_publ_flag
N3 N4 1.329(3) . ?
N3 N2 1.336(3) . ?
N1 N1 1.257(4) 3_556 ?
N1 C1 1.409(3) . ?
N5 C1 1.330(3) . ?
N5 N4 1.337(3) . ?
N2 C1 1.337(3) . ?
N6 N7 1.453(3) . ?
 
loop_
  _geom_angle_atom_site_label_1
  _geom_angle_atom_site_label_2
  _geom_angle_atom_site_label_3
  _geom_angle
  _geom_angle_site_symmetry_1
  _geom_angle_site_symmetry_3
  _geom_angle_publ_flag
N4 N3 N2 109.7(2) . . ?
N1 N1 C1 113.1(3) 3_556 . ?
C1 N5 N4 104.5(2) . . ?
N3 N2 C1 104.02(19) . . ?
N3 N4 N5 109.2(2) . . ?
N5 C1 N2 112.6(2) . . ?
N5 C1 N1 119.0(2) . . ?
N2 C1 N1 128.4(2) . . ?
 
_diffrn_measured_fraction_theta_max    0.645
_diffrn_reflns_theta_full              28.90
_diffrn_measured_fraction_theta_full   0.645
_refine_diff_density_max    0.473
_refine_diff_density_min   -0.246
_refine_diff_density_rms    0.062

#===END

 
data_d:\frames\hamm6\work\hamm6
 
#  1. SUBMISSION DETAILS

_publ_contact_author
;
       Heinrich N\"oth
       Institut f\"ur anorganische Chemie
       Universit\"at M\"unchen
       Butenandtstr. 5-13 (Haus D)
       81377 M\"unchen
       Bundesrepublik Deutschland
;
_publ_contact_author_phone        '089 2180 7454'
_publ_contact_author_fax          '089 2180 7865'
_publ_contact_author_email        H.Noeth@lrz.uni-muenchen.de
_publ_requested_journal           ?

#  3. TITLE AND AUTHOR LIST

_publ_section_title
;
[N2H5]+2[N4C-N=N-CN4]2-: A New High-Nitrogen High-Energetic Material
;


loop_
_publ_author_name
_publ_author_address
       'Heinrich N\"oth'
;     Institut f\"ur anorganische Chemie
       Universit\"at M\"unchen
       Butenandtstr. 5-13 (Haus D)
       81377 M\"unchen
       Bundesrepublik Deutschland
;
       'Th. Klap\"otke'
;     Institut f\"ur anorganische Chemie
       Universit\"at M\"unchen
       Butenandtstr. 5-13 (Haus D)
       81377 M\"unchen
       Bundesrepublik Deutschland
;
       'A. Hammerl'
;     Institut f\"ur anorganische Chemie
       Universit\"at M\"unchen
       Butenandtstr. 5-13 (Haus D)
       81377 M\"unchen
       Bundesrepublik Deutschland
;
  'M. Warchhold'
;     Institut f\"ur anorganische Chemie
       Universit\"at M\"unchen
       Butenandtstr. 5-13 (Haus D)
       81377 M\"unchen
       Bundesrepublik Deutschland
;
       'G. Holl'
;     Wehrwissenschaftliches Institut fuer Werk-, Explosiv- und Betriebsstoffe
       53913 Swisstal
       Bundesrepublik Deutschland
;
       'M. Kaiser'
;     Wehrwissenschaftliches Institut fuer Werk-, Explosiv- und Betriebsstoffe
       53913 Swisstal
       Bundesrepublik Deutschland
;
       'U. Ticmanis'
;     Wehrwissenschaftliches Institut fuer Werk-, Explosiv- und Betriebsstoffe
       53913 Swisstal
       Bundesrepublik Deutschland
;


_publ_manuscript_creation         'RTF-File by CIFRTF (H.Schwenk 1996)'

_audit_creation_method            'SHELXL-CIF-file updated by CIFRTF'
_chemical_name_systematic
;
?
;
_chemical_name_common             ?
_chemical_melting_point           ?
_chemical_formula_moiety          ?
_chemical_formula_sum
  'C2 H18 N18'
_chemical_formula_weight          294.34
 
loop_
  _atom_type_symbol
  _atom_type_description
  _atom_type_scat_dispersion_real
  _atom_type_scat_dispersion_imag
  _atom_type_scat_source
  'C'  'C'   0.0033   0.0016
  'International Tables Vol C Tables 4.2.6.8 and 6.1.1.4'
  'H'  'H'   0.0000   0.0000
  'International Tables Vol C Tables 4.2.6.8 and 6.1.1.4'
  'N'  'N'   0.0061   0.0033
  'International Tables Vol C Tables 4.2.6.8 and 6.1.1.4'
 
_symmetry_cell_setting            Triclinic
_symmetry_space_group_name_H-M    P-1
 
loop_
  _symmetry_equiv_pos_as_xyz
  'x, y, z'
  '-x, -y, -z'
 
_cell_length_a                    4.6208(6)
_cell_length_b                    8.5854(12)
_cell_length_c                    9.2705(13)
_cell_angle_alpha                 108.486(2)
_cell_angle_beta                  95.290(2)
_cell_angle_gamma                 102.991(2)
_cell_volume                      334.51(8)
_cell_formula_units_Z             1
_cell_measurement_temperature     193(2)
_cell_measurement_reflns_used     444
_cell_measurement_theta_min       20.00
_cell_measurement_theta_max       1.00
 
_exptl_crystal_description        needle
_exptl_crystal_colour             yellow
_exptl_crystal_size_max           0.40
_exptl_crystal_size_mid           0.30
_exptl_crystal_size_min           0.20
_exptl_crystal_density_meas       ?
_exptl_crystal_density_diffrn     1.461
_exptl_crystal_density_method     'not measured'
_exptl_crystal_F_000              156
_exptl_absorpt_coefficient_mu     0.116
_exptl_absorpt_correction_type    SADABS
_exptl_absorpt_correction_T_min   0.642258
_exptl_absorpt_correction_T_max   0.928062
_exptl_absorpt_process_details    ?
 
_exptl_special_details
;
Diffractometer operator           M. Warchhold
scanspeed_seconds/frame           10
1200 frames measured in phi (0-360) with chi=0 and om=2th=25
65 frames measured in om (15-35) with chi=280, 2th=29 and phi=0
Crystal mounted in perfluorpolyetheroil
;
 
_diffrn_ambient_temperature       193(2)
_diffrn_radiation_wavelength      0.71073
_diffrn_radiation_type            MoK\a
_diffrn_radiation_source          'fine-focus sealed tube'
_diffrn_radiation_monochromator   graphite
_diffrn_measurement_device_type   'Siemens SMART Area-detector'
_diffrn_measurement_method        Hemisphere
_diffrn_detector_area_resol_mean  ?
_diffrn_standards_number          ?
_diffrn_standards_interval_count  ?
_diffrn_standards_interval_time   0
_diffrn_standards_decay_%         ?
_diffrn_reflns_number             1929
_diffrn_reflns_av_R_equivalents   0.0226
_diffrn_reflns_av_sigmaI/netI     0.0266
_diffrn_reflns_limit_h_min        -3
_diffrn_reflns_limit_h_max        6
_diffrn_reflns_limit_k_min        -10
_diffrn_reflns_limit_k_max        10
_diffrn_reflns_limit_l_min        -11
_diffrn_reflns_limit_l_max        11
_diffrn_reflns_theta_min          2.35
_diffrn_reflns_theta_max          27.82
_reflns_number_total              1008
_reflns_number_gt                 868
_reflns_threshold_expression      >2sigma(I)
 
_computing_data_collection        'SMART (V4.C50)'
_computing_cell_refinement        'SMART (V4.C50)'
_computing_data_reduction         'SAINT (V4.D50)'
_computing_structure_solution     'SHELXS-97 (Sheldrick, 1990)' '
_computing_structure_refinement   'SHELXL-97 (Sheldrick, 1997)' '
_computing_molecular_graphics     'XP (SHELXTL-Ver.5)'
_computing_publication_material   'SHELXL (Sheldrick 1997)'
 
_refine_special_details
;
All hydrogens were found by fourie difference-map and refined free.

  Refinement of F^2^ against ALL reflections.  The weighted R-factor wR and
  goodness of fit S are based on F^2^, conventional R-factors R are based
  on F, with F set to zero for negative F^2^. The threshold expression of
  F^2^ > 2sigma(F^2^) is used only for calculating R-factors(gt) etc. and is
  not relevant to the choice of reflections for refinement.  R-factors based
  on F^2^ are statistically about twice as large as those based on F, and R-
  factors based on ALL data will be even larger.
;
 
_refine_ls_structure_factor_coef  Fsqd
_refine_ls_matrix_type            full
_refine_ls_weighting_scheme       calc
_refine_ls_weighting_details
  'calc w=1/[\s^2^(Fo^2^)+(0.0655P)^2^+0.0523P] where P=(Fo^2^+2Fc^2^)/3'
_atom_sites_solution_primary      'direct methods'
_atom_sites_solution_secondary    difmap
_atom_sites_solution_hydrogens    geometrically
_refine_ls_hydrogen_treatment     'mixed '
_refine_ls_extinction_method      SHELXL
_refine_ls_extinction_coef        0.13(2)
_refine_ls_extinction_expression
  'Fc^*^=kFc[1+0.001xFc^2^\l^3^/sin(2\q)]^-1/4^'
_refine_ls_number_reflns          1008
_refine_ls_number_parameters      128
_refine_ls_number_restraints      0
_refine_ls_R_factor_all           0.0417
_refine_ls_R_factor_gt            0.0354
_refine_ls_wR_factor_ref          0.0989
_refine_ls_wR_factor_gt           0.0949
_refine_ls_goodness_of_fit_ref    1.045
_refine_ls_restrained_S_all       1.045
_refine_ls_shift/su_max           0.000
_refine_ls_shift/su_mean          0.000
 
loop_
  _atom_site_label
  _atom_site_type_symbol
  _atom_site_fract_x
  _atom_site_fract_y
  _atom_site_fract_z
  _atom_site_U_iso_or_equiv
  _atom_site_adp_type
  _atom_site_occupancy
  _atom_site_symmetry_multiplicity
  _atom_site_calc_flag
  _atom_site_refinement_flags
  _atom_site_disorder_assembly
  _atom_site_disorder_group
N1 N 0.4091(3) 0.95743(15) 0.43719(14) 0.0220(4) Uani 1 1 d . . .
N2 N 0.2326(4) 1.21332(16) 0.45959(15) 0.0242(4) Uani 1 1 d . . .
N3 N 0.0302(4) 1.24135(17) 0.36500(15) 0.0267(4) Uani 1 1 d . . .
N4 N -0.0817(4) 1.10227(17) 0.24038(15) 0.0284(4) Uani 1 1 d . . .
N5 N 0.0472(4) 0.98029(17) 0.25193(15) 0.0276(4) Uani 1 1 d . . .
N6 N 0.6694(4) 1.2840(2) -0.01758(18) 0.0291(4) Uani 1 1 d . . .
H61 H 0.821(6) 1.358(3) 0.048(3) 0.040(6) Uiso 1 1 d . . .
H62 H 0.732(6) 1.193(3) -0.067(3) 0.049(6) Uiso 1 1 d . . .
N7 N 0.4506(4) 1.23852(18) 0.07385(17) 0.0272(4) Uani 1 1 d . . .
H71 H 0.521(6) 1.178(3) 0.127(3) 0.047(6) Uiso 1 1 d . . .
H72 H 0.290(6) 1.169(3) 0.007(3) 0.051(7) Uiso 1 1 d . . .
N8 N 0.1045(4) 1.55943(18) 0.27988(16) 0.0265(4) Uani 1 1 d . . .
H81 H 0.079(5) 1.488(3) 0.340(2) 0.040(6) Uiso 1 1 d . . .
H82 H 0.119(5) 1.663(3) 0.345(3) 0.045(6) Uiso 1 1 d . . .
N9 N 0.4062(4) 1.56855(19) 0.24508(17) 0.0261(4) Uani 1 1 d . . .
H91 H 0.434(5) 1.453(3) 0.200(3) 0.046(6) Uiso 1 1 d . . .
H92 H 0.551(5) 1.631(3) 0.331(3) 0.035(5) Uiso 1 1 d . . .
H93 H 0.421(5) 1.625(2) 0.174(2) 0.039(5) Uiso 1 1 d . . .
C1 C 0.2384(4) 1.05226(18) 0.38673(16) 0.0201(4) Uani 1 1 d . . .
 
loop_
  _atom_site_aniso_label
  _atom_site_aniso_U_11
  _atom_site_aniso_U_22
  _atom_site_aniso_U_33
  _atom_site_aniso_U_23
  _atom_site_aniso_U_13
  _atom_site_aniso_U_12
N1 0.0216(11) 0.0199(7) 0.0221(6) 0.0061(5) 0.0010(6) 0.0039(6)
N2 0.0266(11) 0.0206(7) 0.0245(7) 0.0069(5) 0.0013(7) 0.0073(6)
N3 0.0292(12) 0.0263(7) 0.0264(7) 0.0109(5) 0.0026(7) 0.0095(7)
N4 0.0299(12) 0.0301(8) 0.0257(7) 0.0096(6) 0.0005(7) 0.0109(7)
N5 0.0300(12) 0.0259(7) 0.0241(7) 0.0056(5) -0.0008(7) 0.0089(7)
N6 0.0288(13) 0.0319(8) 0.0246(7) 0.0061(6) 0.0042(8) 0.0098(8)
N7 0.0285(12) 0.0236(7) 0.0274(7) 0.0077(6) 0.0029(7) 0.0056(7)
N8 0.0247(11) 0.0222(7) 0.0300(7) 0.0060(6) 0.0053(8) 0.0055(7)
N9 0.0271(12) 0.0254(7) 0.0216(7) 0.0036(6) 0.0009(7) 0.0069(7)
C1 0.0199(12) 0.0190(7) 0.0193(7) 0.0052(6) 0.0021(7) 0.0034(7)
 
_geom_special_details
;
  All esds (except the esd in the dihedral angle between two l.s. planes)
  are estimated using the full covariance matrix.  The cell esds are taken
  into account individually in the estimation of esds in distances, angles
  and torsion angles; correlations between esds in cell parameters are only
  used when they are defined by crystal symmetry.  An approximate (isotropic)
  treatment of cell esds is used for estimating esds involving l.s. planes.
;
 
loop_
  _geom_bond_atom_site_label_1
  _geom_bond_atom_site_label_2
  _geom_bond_distance
  _geom_bond_site_symmetry_2
  _geom_bond_publ_flag
N1 N1 1.265(3) 2_676 ?
N1 C1 1.402(2) . ?
N2 N3 1.336(2) . ?
N2 C1 1.340(2) . ?
N3 N4 1.329(2) . ?
N4 N5 1.343(2) . ?
N5 C1 1.336(2) . ?
N6 N7 1.443(2) . ?
N8 N9 1.450(2) . ?
 
loop_
  _geom_angle_atom_site_label_1
  _geom_angle_atom_site_label_2
  _geom_angle_atom_site_label_3
  _geom_angle
  _geom_angle_site_symmetry_1
  _geom_angle_site_symmetry_3
  _geom_angle_publ_flag
N1 N1 C1 113.51(15) 2_676 . ?
N3 N2 C1 104.44(13) . . ?
N4 N3 N2 109.78(13) . . ?
N3 N4 N5 109.06(14) . . ?
C1 N5 N4 104.68(12) . . ?
N5 C1 N2 112.03(14) . . ?
N5 C1 N1 119.84(13) . . ?
N2 C1 N1 128.11(15) . . ?
 
_diffrn_measured_fraction_theta_max    0.638
_diffrn_reflns_theta_full              27.82
_diffrn_measured_fraction_theta_full   0.638
_refine_diff_density_max    0.226
_refine_diff_density_min   -0.150
_refine_diff_density_rms    0.043

#===END
